# Supplementary material for: Evaluation of Patient-Reported Symptoms and Functioning after Treatment for Endometrial Cancer
Source: MDPI journal article supplement (doi:10.3390/curroncol29080414), 2022-07-22
Supplement: s1 [file s1]

*Supplementary Material*

# **Evaluation of Patient Reported Symptoms and Functioning after Treatment for Endometrial Cancer**

**Monika Sobočan<sup>1,2,\*</sup>, Dorotea Gašpar<sup>2</sup>, Estera Gjuras<sup>2</sup> and Jure Knez<sup>1,2</sup>**

<sup>1</sup> Division of Gynecology and Perinatology, University Medical Centre Maribor, 2000 Maribor, Slovenia

<sup>2</sup> Department of Obstetrics and Gynecology, Faculty of Medicine, University of Maribor, 2000 Maribor, Slovenia

\* Correspondence: monika.sobocan@gmail.com

**Table S1.** Correlational matrix of symptoms.

|                                  | <u>Lymph-<br/>edema</u>                            | <u>Urological</u>                                  | <u>GI</u>                                          | <u>PoorBody</u>                               | <u>BackPain</u>                                    | <u>Tingling and<br/>numbness</u>                   | <u>Muscular<br/>pain</u>                           | <u>Hair loss</u>                                   | <u>Taste change</u>                                |
|----------------------------------|----------------------------------------------------|----------------------------------------------------|----------------------------------------------------|-----------------------------------------------|----------------------------------------------------|----------------------------------------------------|----------------------------------------------------|----------------------------------------------------|----------------------------------------------------|
| <u>Lymph-edema</u>               | N/A                                                | $r_s = 0.374, p < 0.001^{**}$<br>(CI95 0.164-.561) | $r_s = 0.226, p = 0.055$<br>(CI95 0.080-.500)      | $r_s = 0.095, p = 0.423$<br>(CI95 -.097-.355) | $r_s = 0.293, p = 0.012^*$<br>(CI95 0.062-.486)    | $r_s = 0.490, p < 0.001^{**}$<br>(CI95 0.264-.628) | $r_s = 0.516, p < 0.001^{**}$<br>(CI95 0.350-.683) | $r_s = 0.076, p = 0.523$<br>(CI95 -.183-.276)      | $r_s = 0.101, p < 0.394$<br>(CI95 -.166-.292)      |
| <u>Urological</u>                | $r_s = 0.374, p < 0.001^{**}$<br>(CI95 0.164-.561) | N/A                                                | $r_s = 0.436, p < 0.001^{**}$<br>(CI95 0.271-.633) | $r_s = 0.145, p = 0.220$<br>(CI95 0.019-.453) | $r_s = 0.251, p = 0.032^*$<br>(CI95 0.002-.439)    | $r_s = 0.376, p < 0.001^{**}$<br>(CI95 0.197-.584) | $r_s = 0.270, p = 0.021^*$<br>(CI95 0.034-.464)    | $r_s = 0.322, p = 0.005^{**}$<br>(CI95 0.067-.490) | $r_s = 0.351, p = 0.002^{**}$<br>(CI95 0.088-.506) |
| <u>GI</u>                        | $r_s = 0.226, p = 0.055$<br>(CI95 0.080-.500)      | $r_s = 0.436, p < 0.001^{**}$<br>(CI95 0.271-.633) | N/A                                                | $r_s = 0.133, p = 0.264$<br>(CI95 0.036-.466) | $r_s = 0.409, p < 0.001^{**}$<br>(CI95 0.196-.583) | $r_s = 0.476, p < 0.001^{**}$<br>(CI95 0.345-.679) | $r_s = 0.213, p = 0.070$<br>(CI95 0.030-.461)      | $r_s = 0.126, p = 0.287$<br>(CI95 -.133-.323)      | $r_s = 0.176, p = 0.136$<br>(CI95 -.074-.375)      |
| <u>PoorBody</u>                  | $r_s = 0.095, p = 0.423$<br>(CI95 -.097-.355)      | $r_s = 0.145, p = 0.220$<br>(CI95 0.019-.453)      | $r_s = 0.133, p = 0.264$<br>(CI95 0.036-.466)      | N/A                                           | $r_s = 0.128, p = 0.279$<br>(CI95 -.055-.392)      | $r_s = 0.098, p = 0.409$<br>(CI95 0.036-.466)      | $r_s = 0.141, p = 0.233$<br>(CI95 -.120-.344)      | $r_s = 0.059, p = 0.619$<br>(CI95 -.079-.371)      | $r_s = 0.090, p = 0.448$<br>(CI95 -.074-.375)      |
| <u>BackPain</u>                  | $r_s = 0.293, p = 0.012^*$<br>(CI95 0.062-.486)    | $r_s = 0.251, p = 0.032^*$<br>(CI95 0.002-.439)    | $r_s = 0.409, p < 0.001^{**}$<br>(CI95 0.196-.583) | $r_s = 0.128, p = 0.279$<br>(CI95 -.055-.392) | N/A                                                | $r_s = 0.460, p < 0.001^{**}$<br>(CI95 0.261-.626) | $r_s = 0.446, p < 0.001^{**}$<br>(CI95 0.244-.616) | $r_s = 0.059, p = 0.618$<br>(CI95 -.161-.297)      | $r_s = 0.141, p = 0.233$<br>(CI95 -.111-.343)      |
| <u>Tingling and<br/>numbness</u> | $r_s = 0.490, p < 0.001^{**}$<br>(CI95 0.264-.628) | $r_s = 0.376, p < 0.001^{**}$<br>(CI95 0.197-.584) | $r_s = 0.476, p < 0.001^{**}$<br>(CI95 0.345-.679) | $r_s = 0.098, p = 0.409$<br>(CI95 0.036-.466) | $r_s = 0.460, p < 0.001^{**}$<br>(CI95 0.261-.626) | N/A                                                | $r_s = 0.387, p < 0.001^{**}$<br>(CI95 0.198-.584) | $r_s = 0.160, p = 0.176$<br>(CI95 0.034-.464)      | $r_s = 0.262, p = 0.025^*$<br>(CI95 0.113-.524)    |
| <u>Muscular pain</u>             | $r_s = 0.516, p < 0.001^{**}$<br>(CI95 0.350-.683) | $r_s = 0.270, p = 0.021^*$<br>(CI95 0.034-.464)    | $r_s = 0.213, p = 0.070$<br>(CI95 0.030-.461)      | $r_s = 0.141, p = 0.233$<br>(CI95 -.120-.334) | $r_s = 0.446, p < 0.001^{**}$<br>(CI95 0.244-.616) | $r_s = 0.387, p < 0.001^{**}$<br>(CI95 0.198-.584) | N/A                                                | $r_s = 0.097, p = 0.413$<br>(CI95 -.117-.337)      | $r_s = 0.161, p = 0.172$<br>(CI95 -.076-.373)      |
| <u>Hair loss</u>                 | $r_s = 0.076, p = 0.523$<br>(CI95 -.183-.276)      | $r_s = 0.322, p = 0.005^{**}$<br>(CI95 0.067-.490) | $r_s = 0.126, p = 0.287$<br>(CI95 -.133-.323)      | $r_s = 0.059, p = 0.619$<br>(CI95 -.079-.371) | $r_s = 0.059, p = 0.618$<br>(CI95 -.161-.297)      | $r_s = 0.160, p = 0.176$<br>(CI95 0.034-.464)      | $r_s = 0.097, p = 0.413$<br>(CI95 -.117-.337)      | N/A                                                | $r_s = 0.907, p < 0.001^{**}$<br>(CI95 0.936-.974) |
| <u>Taste change</u>              | $r_s = 0.101, p < 0.394$<br>(CI95 -.166-.292)      | $r_s = 0.351, p = 0.002^{**}$<br>(CI95 0.088-.506) | $r_s = 0.176, p = 0.136$<br>(CI95 -.074-.375)      | $r_s = 0.090, p = 0.448$<br>(CI95 -.074-.375) | $r_s = 0.141, p = 0.233$<br>(CI95 -.111-.343)      | $r_s = 0.262, p = 0.025^*$<br>(CI95 0.113-.524)    | $r_s = 0.161, p = 0.172$<br>(CI95 -.076-.373)      | $r_s = 0.907, p < 0.001^{**}$<br>(CI95 0.936-.974) | N/A                                                |

**Table S2.** Impact of surgical therapy on Patient Reported Outcomes

|                         | Minimally invasive therapy<br>(Mean, SD) | Open surgery (Mean,<br>SD) | Significance |
|-------------------------|------------------------------------------|----------------------------|--------------|
| Lymphoedema             | 30.0 (26.2)                              | 38.7 (28.7)                | $p > 0.221$  |
| Urological              | 31.6 (26.8)                              | 32.6 (26.8)                | $p > 855$    |
| Gastrointestinal        | 21.6 (16.7)                              | 23.4 (18.7)                | $p > 881$    |
| Poor Body image         | 12.0 (22.2)                              | 11.7 (22.9)                | $p > 0.999$  |
| Back Pain               | 47.8 (30.0)                              | 56.8 (35.4)                | $p > 0.249$  |
| Tingling and numbness   | 37.4 (32.0)                              | 33.6 (31.9)                | $p > 0.688$  |
| Muscular pain           | 34.4 (30.0)                              | 46.7 (32.9)                | $p > 0.126$  |
| Hair loss               | 20.2 (28.0)                              | 13.1 (29.8)                | $p > 0.133$  |
| Taste change            | 20.2 (28.0)                              | 10.2 (29.2)                | $p > 0.031$  |
| Sexual interest         | 14.3 (18.4)                              | 16.2 (22.4)                | $p > 0.892$  |
| Sexual activity         | 12.8 (19.4)                              | 11.8 (19.3)                | $p > 0.818$  |
| Sexual enjoyment        | 44.2 (27.4); ( $n = 19$ )                | 46.3 (30.5); ( $n = 8$ )   | $p > 0.955$  |
| Sexual/Vaginal problems | 23.9 (25.4); ( $n = 19$ )                | 26.9 (22.3); ( $n = 8$ )   | $p > 0.607$  |

**Table S3.** Impact of lymph node treatment on Patient Reported Outcomes

|                         | SNB<br>(Mean, SD)         | LND<br>(Mean, SD)        | SNB with LND<br>(Mean, SD) | no LN treatment (Mean,<br>SD) | Significance |
|-------------------------|---------------------------|--------------------------|----------------------------|-------------------------------|--------------|
| Lymphoedema             | 28.1 (25.9)               | 39.7 (28.9)              | 26.6 (21.3)                | 35.1 (29.9)                   | $p > 0.488$  |
| Urological              | 28.4 (23.8)               | 36.0 (27.3)              | 26.4 (29.2)                | 35.8 (31.4)                   | $p > 0.734$  |
| Gastrointestinal        | 21.1 (14.3)               | 20.9 (18.7)              | 24.9 (13.1)                | 25.8 (23.5)                   | $p > 0.830$  |
| Poor Body image         | 11.3 (22.4)               | 9.2 (17.8)               | 9.6 (18.9)                 | 19.6 (31.0)                   | $p > 0.738$  |
| Back Pain               | 48.5 (28.2)               | 60.9 (31.8)              | 33.9 (19.3)                | 47.4 (41.3)                   | $p > 0.191$  |
| Tingling and numbness   | 30.0 (28.4)               | 36.7 (30.8)              | 52.9 (26.0)                | 39.1 (42.2)                   | $p > 0.374$  |
| Muscular pain           | 37.4 (29.8)               | 42.7 (36.0)              | 33.9 (19.3)                | 36.4 (33.3)                   | $p > 0.924$  |
| Hair loss               | 15.0 (21.6)               | 12.2 (26.4)              | 19.1 (37.8)                | 33.6 (37.6)                   | $p > 0.204$  |
| Taste change            | 13.8 (21.4)               | 10.7 (26.1)              | 19.1 (37.8)                | 33.6 (37.6)                   | $p > 0.126$  |
| Sexual interest         | 13.9 (17.0)               | 16.9 (22.7)              | 9.7 (16.6)                 | 16.9 (22.7)                   | $p > 0.902$  |
| Sexual activity         | 15.1 (19.5)               | 10.8 (19.2)              | 0 (.00)                    | 16.9 (22.7)                   | $p > 0.192$  |
| Sexual enjoyment        | 44.8 (29.7); ( $n = 12$ ) | 52.7 (32.5); ( $n = 7$ ) | 0; ( $n = 1$ )             | 43.4 (16.1); ( $n = 7$ )      | $p > 0.417$  |
| Sexual/Vaginal problems | 19.2 (16.7); ( $n = 12$ ) | 30.6 (25.6); ( $n = 7$ ) | 0; ( $n = 1$ )             | 32.1 (33.0); ( $n = 7$ )      | $p > 0.451$  |

LN: lymph-node, SNB: sentinel lymph-node biopsy, LND: lymphadenectomy, SNB with LND: SNB with contralateral LND.
